# Supplementary material
Source: ML conference proceedings conference paper supplement (https://openreview.net/forum?id=BkvdAYhyqm)
Supplement: supplementary_material [file attachment]

- Michael C.-K. Wu, Stephen V. David, and Jack L. Gallant. Complete functional characterization of sensory neurons by system identification. *Annual Review of Neuroscience*, 29:477–505, 2006. ISSN 0147-006X. doi: 10.1146/annurev.neuro.29.051605.113024.
- Zeyu Yun, Yubei Chen, Bruno A Olshausen, and Yann LeCun. Transformer visualization via dictionary learning: contextualized embedding as a linear superposition of transformer factors. *arXiv preprint arXiv:2103.15949*, 2021.
- Omar Zaidan and Jason Eisner. Modeling annotators: A generative approach to learning from annotator rationales. In *Proceedings of the 2008 conference on Empirical methods in natural language processing*, pp. 31–40, 2008.
- Matthew D Zeiler and Rob Fergus. Visualizing and understanding convolutional networks. In *European conference on computer vision*, pp. 818–833. Springer, 2014.
- Rowan Zellers, Yonatan Bisk, Ali Farhadi, and Yejin Choi. From recognition to cognition: Visual commonsense reasoning. In *Proceedings of the IEEE/CVF conference on computer vision and pattern recognition*, pp. 6720–6731, 2019.
- Peitian Zhang, Shitao Xiao, Zheng Liu, Zhicheng Dou, and Jian-Yun Nie. Retrieve anything to augment large language models. *arXiv preprint arXiv:2310.07554*, 2023.
- Tianyi Zhang, Varsha Kishore, Felix Wu, Kilian Q Weinberger, and Yoav Artzi. Bertscore: Evaluating text generation with bert. *arXiv preprint arXiv:1904.09675*, 2019.
- Xiang Zhang, Junbo Jake Zhao, and Yann LeCun. Character-level convolutional networks for text classification. In *NIPS*, 2015.
- Ruiqi Zhong, Kristy Lee, Zheng Zhang, and Dan Klein. Adapting language models for zero-shot learning by meta-tuning on dataset and prompt collections. *arXiv preprint arXiv:2104.04670*, 2021.
- Ruiqi Zhong, Charlie Snell, Dan Klein, and Jacob Steinhardt. Describing differences between text distributions with natural language. In *International Conference on Machine Learning*, pp. 27099–27116. PMLR, 2022.
- Ruiqi Zhong, Peter Zhang, Steve Li, Jinwoo Ahn, Dan Klein, and Jacob Steinhardt. Goal driven discovery of distributional differences via language descriptions. *arXiv preprint arXiv:2302.14233*, 2023.
- Zhiying Zhu, Weixin Liang, and James Zou. Gsclip: A framework for explaining distribution shifts in natural language. *arXiv preprint arXiv:2206.15007*, 2022.
- Caleb Ziems, William Held, Omar Shaikh, Jiaao Chen, Zhehao Zhang, and Diyi Yang. Can large language models transform computational social science? *arXiv preprint arXiv:2305.03514*, 2023.

## A APPENDIX

### A.1 METHODOLOGY DETAILS EXTENDED

Table A1: Statistics on corpuses used for explanation. Wikitext is used for BERT explanation and Moth stories are used for fMRI voxel explanation.

|                                   | Unique unigrams | Unique bigrams | Unique trigrams |
|-----------------------------------|-----------------|----------------|-----------------|
| Wikitext (Merity et al., 2016)    | 157k            | 3,719k         | 9,228k          |
| Moth stories (LeBel et al., 2022) | 117k            | 79k            | 140k            |
| Combined                          | 158k            | 3,750k         | 9,334k          |

**Prompts used in SASC** The summarization step summarizes 30 randomly chosen ngrams from the top 50 and generates 5 candidate explanations using the prompt *Here is a list of phrases: \{n\{phrases}\} \n What is a common theme among these phrases? \n The common theme among these phrases is \_\_\_\_.*

In the synthetic scoring step, we generate similar synthetic strings with the prompt *Generate 10 phrases that are similar to the concept of \{explanation\}.* For dissimilar synthetic strings we use the prompt *Generate 10 phrases that are not similar to the concept of \{explanation\}.* Minor automatic processing is applied to LLM outputs, e.g. parsing a bulleted list, converting to lowercase, and removing extra whitespaces.

## A.2 SYNTHETIC MODULE INTERPRETATION

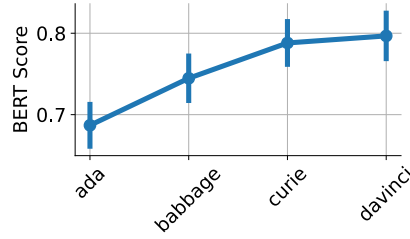

Figure A1: The BERT score between generated explanation and groundtruth explanation generally increases as the size of the helper LLM for summarization/generation increases. Models are accessed via the OpenAI API (text-ada-001, text-babbage-001, text-curie-001, text-davinci-001, all accessed on Feb. 2023) and are in order of increasing size. BERT score for each module is computed as the maximum over the 5 generated explanations.

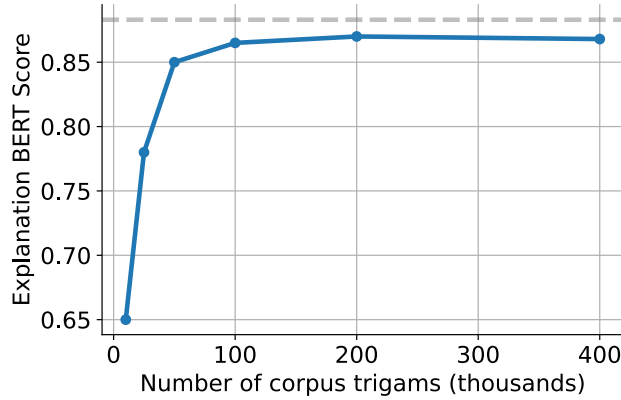

Figure A2: Explanation BERT score for the 54 synthetic datasets as a function of corpus size. Performance plateaus around 100,000 ngrams. Corpus is created by randomly subsampling the unique trigrams in the WikiText dataset (Merity et al., 2016). Gray dotted line shows the result when evaluating on dataset-specific corpora, as in the *Default* setting in Table 1.

Table A2: 54 synthetic modules and information about their underlying data corpus. Note that some modules use the same groundtruth Keyword (e.g. *environmentalism*), but that the underlying data corpus contains different data (e.g. text that is pro/anti environmentalism).

| Module name         | Groundtruth keyphrase | Dataset explanation                                | Examples | Unique unigrams |
|---------------------|-----------------------|----------------------------------------------------|----------|-----------------|
| 0-irony             | sarcasm               | contains irony                                     | 590      | 3897            |
| 1-objective         | unbiased              | is a more objective description of what happened   | 739      | 5628            |
| 2-subjective        | subjective            | contains subjective opinion                        | 757      | 5769            |
| 3-god               | religious             | believes in god                                    | 164      | 1455            |
| 4-atheism           | atheistic             | is against religion                                | 172      | 1472            |
| 5-evacuate          | evacuation            | involves a need for people to evacuate             | 2670     | 16505           |
| 6-terrorism         | terrorism             | describes a situation that involves terrorism      | 2640     | 16608           |
| 7-crime             | crime                 | involves crime                                     | 2621     | 16333           |
| 8-shelter           | shelter               | describes a situation where people need shelter    | 2620     | 16347           |
| 9-food              | hunger                | is related to food security                        | 2642     | 16276           |
| 10-infrastructure   | infrastructure        | is related to infrastructure                       | 2664     | 16548           |
| 11-regime change    | regime change         | describes a regime change                          | 2670     | 16382           |
| 12-medical          | health                | is related to a medical situation                  | 2675     | 16223           |
| 13-water            | water                 | involves a situation where people need clean water | 2619     | 16135           |
| 14-search           | rescue                | involves a search/rescue situation                 | 2628     | 16131           |
| 15-utility          | utility               | expresses need for utility, energy or sanitation   | 2640     | 16249           |
| 16-hillary          | Hillary               | is against Hillary                                 | 224      | 1693            |
| 17-hillary          | Hillary               | supports hillary                                   | 218      | 1675            |
| 18-offensive        | derogatory            | contains offensive content                         | 652      | 6109            |
| 19-offensive        | toxic                 | insult women or immigrants                         | 2188     | 11839           |
| 20-pro-life         | pro-life              | is pro-life                                        | 213      | 1633            |
| 21-pro-choice       | abortion              | supports abortion                                  | 209      | 1593            |
| 22-physics          | physics               | is about physics                                   | 10360    | 93810           |
| 23-computer science | computers             | is related to computer science                     | 10441    | 93947           |
| 24-statistics       | statistics            | is about statistics                                | 9286     | 86874           |
| 25-math             | math                  | is about math research                             | 8898     | 85118           |
| 26-grammar          | ungrammatical         | is ungrammatical                                   | 834      | 2217            |
| 27-grammar          | grammatical           | is grammatical                                     | 826      | 2236            |
| 28-sexism           | sexist                | is offensive to women                              | 209      | 1641            |
| 29-sexism           | feminism              | supports feminism                                  | 215      | 1710            |
| 30-news             | world                 | is about world news                                | 5778     | 13023           |
| 31-sports           | sports news           | is about sports news                               | 5674     | 12849           |
| 32-business         | business              | is related to business                             | 5699     | 12913           |
| 33-tech             | technology            | is related to technology                           | 5727     | 12927           |
| 34-bad              | negative              | contains a bad movie review                        | 357      | 16889           |
| 35-good             | good                  | thinks the movie is good                           | 380      | 17497           |
| 36-quantity         | quantity              | asks for a quantity                                | 1901     | 5144            |
| 37-location         | location              | asks about a location                              | 1925     | 5236            |
| 38-person           | person                | asks about a person                                | 1848     | 5014            |
| 39-entity           | entity                | asks about an entity                               | 1896     | 5180            |
| 40-abbreviation     | abbreviation          | asks about an abbreviation                         | 1839     | 5045            |
| 41-defin            | definition            | contains a definition                              | 651      | 4508            |
| 42-environment      | environmentalism      | is against environmentalist                        | 124      | 1117            |
| 43-environment      | environmentalism      | is environmentalist                                | 119      | 1072            |
| 44-spam             | spam                  | is a spam                                          | 360      | 2470            |
| 45-fact             | facts                 | asks for factual information                       | 704      | 11449           |
| 46-opinion          | opinion               | asks for an opinion                                | 719      | 11709           |
| 47-math             | science               | is related to math and science                     | 7514     | 53973           |
| 48-health           | health                | is related to health                               | 7485     | 53986           |
| 49-computer         | computers             | related to computer or internet                    | 7486     | 54256           |
| 50-sport            | sports                | is related to sports                               | 7505     | 54718           |
| 51-entertainment    | entertainment         | is about entertainment                             | 7461     | 53573           |
| 52-family           | relationships         | is about family and relationships                  | 7438     | 54680           |
| 53-politic          | politics              | is related to politics or government               | 7410     | 53393           |

Table A3: 54 synthetic datasets and the regex used to check whether an explanation is correct (after applying lowercasing). These regexes form guide the manual inspection of explanation accuracy: the original label is assigned by the regex and then fixed by the human when errors (which are relatively rare) occur.

| Module name         | Dataset explanation                                | Regex check                                                                                      |
|---------------------|----------------------------------------------------|--------------------------------------------------------------------------------------------------|
| 0-irony             | contains irony                                     | irony sarcas                                                                                     |
| 1-objective         | is a more objective description of what happened   | objective factual nonpersonal neutral unbias                                                     |
| 2-subjective        | contains subjective opinion                        | subjective opinion personal bias                                                                 |
| 3-god               | believes in god                                    | god religious religion                                                                           |
| 4-atheism           | is against religion                                | atheism atheist anti-religion against religion                                                   |
| 5-evacuate          | involves a need for people to evacuate             | evacuat flee escape                                                                              |
| 6-terrorism         | describes a situation that involves terrorism      | terrorism terror                                                                                 |
| 7-crime             | involves crime                                     | crime criminal criminality                                                                       |
| 8-shelter           | describes a situation where people need shelter    | shelter home house                                                                               |
| 9-food              | is related to food security                        | food hunger needs                                                                                |
| 10-infrastructure   | is related to infrastructure                       | infrastructure buildings roads bridges build                                                     |
| 11-regime change    | describes a regime change                          | regime change coup revolution revolt political action political event upheaval                   |
| 12-medical          | is related to a medical situation                  | medical health                                                                                   |
| 13-water            | involves a situation where people need clean water | water                                                                                            |
| 14-search           | involves a search/rescue situation                 | search rescue help                                                                               |
| 15-utility          | expresses need for utility, energy or sanitation   | utility energy sanitation electricity power                                                      |
| 16-hillary          | is against Hillary                                 | hillary clinton against Hillary opposed to Hillary republican against Clinton opposed to Clinton |
| 17-hillary          | supports hillary                                   | hillary clinton support Hillary support Clinton democrat                                         |
| 18-offensive        | contains offensive content                         | offensive toxic abusive insulting insult abuse offend offend derogatory                          |
| 19-offensive        | insult women or immigrants                         | offensive toxic abusive insulting insult abuse offend offend women immigrants                    |
| 20-pro-life         | is pro-life                                        | pro-life abortion pro life                                                                       |
| 21-pro-choice       | supports abortion                                  | pro-choice abortion pro choice                                                                   |
| 22-physics          | is about physics                                   | physics                                                                                          |
| 23-computer science | is related to computer science                     | computer science computer artificial intelligence ai                                             |
| 24-statistics       | is about statistics                                | statistics stat probability                                                                      |
| 25-math             | is about math research                             | math arithmetic algebra geometry                                                                 |
| 26-grammar          | is ungrammatical                                   | grammar syntax punctuation grammat linguistic                                                    |
| 27-grammar          | is grammatical                                     | grammar syntax punctuation grammat linguistic                                                    |
| 28-sexis            | is offensive to women                              | sexis women femini                                                                               |
| 29-sexis            | supports feminism                                  | sexis women femini                                                                               |
| 30-news             | is about world news                                | world cosmopolitan international global                                                          |
| 31-sports           | is about sports news                               | sports                                                                                           |
| 32-business         | is related to business                             | business economics finance                                                                       |
| 33-tech             | is related to technology                           | tech                                                                                             |
| 34-bad              | contains a bad movie review                        | bad negative awful terrible horrible poor boring dislike                                         |
| 35-good             | thinks the movie is good                           | good great like love positive awesome amazing excellent                                          |
| 36-quantity         | asks for a quantity                                | quantity number numeric                                                                          |
| 37-location         | asks about a location                              | location place                                                                                   |
| 38-person           | asks about a person                                | person individual people                                                                         |
| 39-entity           | asks about an entity                               | entity thing object                                                                              |
| 40-abbreviation     | asks about an abbreviation                         | abbreviation abbr acronym                                                                        |
| 41-defin            | contains a definition                              | defin meaning explain                                                                            |
| 42-environment      | is against environmentalist                        | environment climate change global warming                                                        |
| 43-environment      | is environmentalist                                | environment climate change global warming                                                        |
| 44-spam             | is a spam                                          | spam annoying unwanted                                                                           |
| 45-fact             | asks for factual information                       | fact info knowledge                                                                              |
| 46-opinion          | asks for an opinion                                | opinion personal bias                                                                            |
| 47-math             | is related to math and science                     | math science                                                                                     |
| 48-health           | is related to health                               | health medical disease                                                                           |
| 49-computer         | related to computer or internet                    | computer internet web                                                                            |
| 50-sport            | is related to sports                               | sport                                                                                            |
| 51-entertainment    | is about entertainment                             | entertainment music movie tv                                                                     |
| 52-family           | is about family and relationships                  | family relationships                                                                             |
| 53-politic          | is related to politics or government               | politic government law                                                                           |

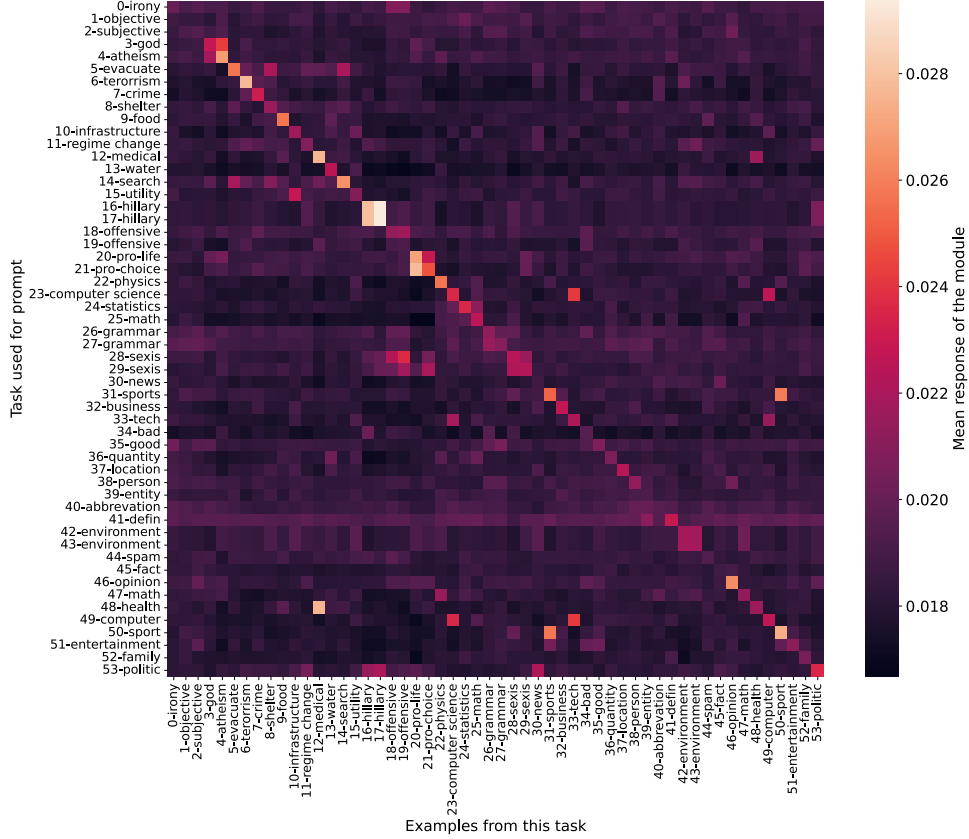

Figure A3: Synthetic modules respond more strongly to phrases related to their keyphrase (diagonal) than to phrases related to the keyphrase of other datasets (off-diagonal). Each value shows the mean response of the module to 5 phrases and each row is normalized using softmax. Each module is constructed using Instructor (Su et al., 2022) with the prompt *Represent the short phrase for clustering:* and the groundtruth keyphrase given in Table A2. Related keyphrases are generated manually.

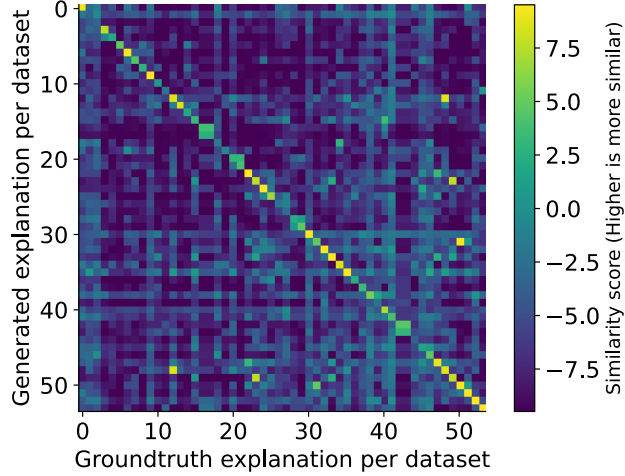

Figure A4: Similarity scores for SASC explanations in the *Default* setting measured by bge-large (BAAI/bge-large-en, (Zhang et al., 2023)), rather than manual inspection or BERT-score, as shown in Table 1. Large values on the diagonal indicate that the explanation generated for a module on a given dataset are similar to the groundtruth explanations for that dataset. The top-1 classification accuracy (i.e. how often the generated explanation is most similar to its corresponding groundtruth explanation) is 81.5%, slightly lower than the assigned accuracy by manual inspection (88.3%). The top-2 accuracy is 88.9%.

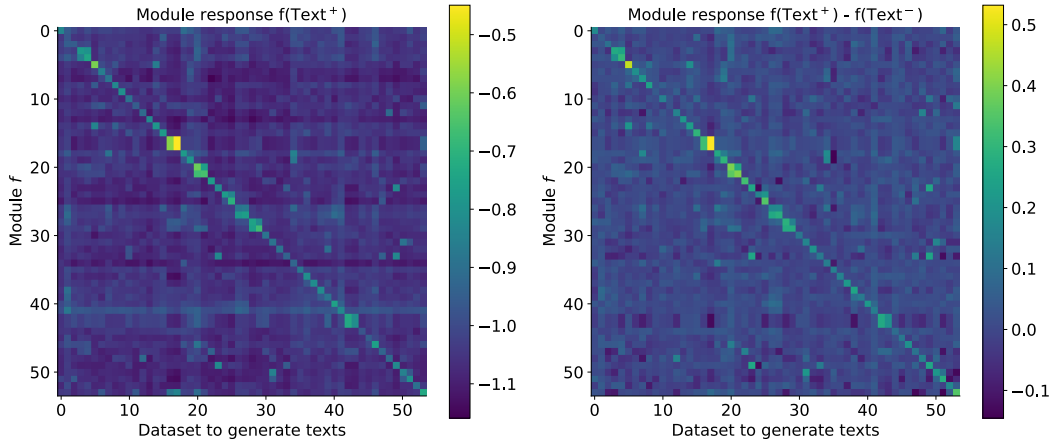

Figure A5: Average module responses for synthetic texts that are related to the explanation (left,  $f(\text{Text}^+)$ ) or the difference between the responses for related and unrelated texts (right,  $f(\text{Text}^+) - f(\text{Text}^-)$ ). Responses correspond to synthetic modules in the *Default* setting. Bright diagonal on the left suggests that  $f$  selectively responds to synthetic texts generated according to the appropriate explanation. On the right, the diagonal is slightly less bright, suggesting that the module does not tend to respond more negatively to unrelated texts  $\text{Text}^-$ .

### A.3 BERT INTERPRETATION

**Details on fitting transformer factors** Pre-trained transformer factors are taken from (Yun et al., 2021). Each transformer factor is the result of running dictionary learning on a matrix  $X$  described as follows. Using a corpus of sentences  $S$  (here wikipedia), embeddings are extracted for each input, layer, and sequence index in BERT. The resulting matrix  $X$  has size  $\left( \underbrace{\text{num\_layers} \cdot \sum_{s \in S} \text{len}(s)}_{13 \text{ for BERT}} \right) \times \underbrace{d}_{768 \text{ for BERT}}$ . Dictionary learning is run on  $X$  with 1,500 dictionary components, resulting in a dictionary  $D \in \mathbb{R}^{1,500 \times d}$ . Here, we take the fitted dictionary released by (Yun et al., 2021) trained on the WikiText dataset (Merity et al., 2016).

During our interpretation pipeline, we require a module which maps text to a scalar coefficient. To interpret a transformer factor as a module, we specify a text input  $t$  and a layer  $l$ . This results in  $\text{len}(t)$  embeddings with dimension  $d$ . We average over these embeddings, and then solve for the dictionary coefficients, to yield a set of coefficients  $A \in \mathbb{R}^{1500}$ . Finally, specifying a dictionary component index yields a single, scalar coefficient.

**Extended BERT explanation results** Table A4 shows examples comparing SASC explanations with human-labeled explanations for all BERT transformer factors labeled in (Yun et al., 2021). Tables A6 to A8 show explanations for modules selected by linear models finetuned on text-classification tasks.

Table A4: Fraction of top logistic regression coefficients that are relevant for a downstream task (extends Table 5). Averaged over 3 random seeds; parentheses show standard error of the mean.

|        | Emotion         | AG News         | SST2            |
|--------|-----------------|-----------------|-----------------|
| Top-10 | 0.50 $\pm$ 0.08 | 1.00 $\pm$ 0.00 | 0.80 $\pm$ 0.14 |
| Top-15 | 0.47 $\pm$ 0.05 | 0.98 $\pm$ 0.03 | 0.69 $\pm$ 0.13 |
| Top-20 | 0.42 $\pm$ 0.09 | 0.98 $\pm$ 0.02 | 0.55 $\pm$ 0.10 |

Table A5: Comparing SASC explanations to all human-labeled explanations for BERT transformer factors. Explanation scores are in units of  $\sigma_f$ .

| Factor Layer | Factor Index | Explanation (Human)                                                                                   | Explanation (SASC)                                                                                                                             | Explanation score (Human) | Explanation score (SASC) |
|--------------|--------------|-------------------------------------------------------------------------------------------------------|------------------------------------------------------------------------------------------------------------------------------------------------|---------------------------|--------------------------|
| 4            | 13           | Numerical values.                                                                                     | numbers                                                                                                                                        | -0.21                     | -0.08                    |
| 10           | 42           | Something unfortunate happened.                                                                       | idea of wrongdoing or illegal activity                                                                                                         | 2.43                      | 1.97                     |
| 0            | 30           | left. Adjective or Verb. Mixed senses.                                                                | someone or something leaving                                                                                                                   | 3.68                      | 5.87                     |
| 4            | 47           | plants. Noun. vegetation.                                                                             | trees                                                                                                                                          | 6.26                      | 5.04                     |
| 10           | 152          | In some locations.                                                                                    | science, technology, and/or medicine                                                                                                           | -0.41                     | 0.03                     |
| 4            | 30           | left. Verb. leaving, exiting.                                                                         | leaving or being left                                                                                                                          | 4.44                      | 0.90                     |
| 10           | 297          | Repetitive structure detector.                                                                        | versions or translations                                                                                                                       | -0.36                     | 0.98                     |
| 10           | 322          | Biography, someone born in some year...                                                               | weapons and warfare                                                                                                                            | 0.19                      | 0.38                     |
| 10           | 13           | Unit exchange with parentheses.                                                                       | names of places, people, or things                                                                                                             | -0.11                     | -0.10                    |
| 10           | 386          | War.                                                                                                  | media, such as television, movies, or video games                                                                                              | 0.20                      | -0.15                    |
| 10           | 184          | Institution with abbreviation.                                                                        | publishing, media, or awards                                                                                                                   | -0.42                     | 0.14                     |
| 2            | 30           | left. Verb. leaving, exiting.                                                                         | leaving or being left                                                                                                                          | 5.30                      | 0.91                     |
| 10           | 179          | Topic: music production.                                                                              | geography                                                                                                                                      | -0.52                     | 0.21                     |
| 6            | 225          | Places in US, followings the convention "city, state".                                                | a place or location                                                                                                                            | 1.88                      | 1.33                     |
| 10           | 25           | Attributive Clauses.                                                                                  | something related to people, places, or things                                                                                                 | 0.01                      | 1.19                     |
| 10           | 125          | Describing someone in a para- phrasing style. Name, Career.                                           | something related to buildings, architecture, or construction                                                                                  | -0.13                     | 0.44                     |
| 6            | 13           | Close Parentheses.                                                                                    | end with a closing punctuation mark (e.g                                                                                                       | -0.08                     | 0.47                     |
| 10           | 99           | Past tense.                                                                                           | people, places, or things                                                                                                                      | -0.77                     | -0.04                    |
| 10           | 24           | Male name.                                                                                            | people, places, and things related to history                                                                                                  | 0.03                      | 0.38                     |
| 10           | 102          | African names.                                                                                        | traditional culture, with references to traditional territories, communities, forms, themes, breakfast, and texts                              | 0.35                      | 1.60                     |
| 4            | 16           | park. Noun. a common first and last name.                                                             | names of parks                                                                                                                                 | -0.03                     | 1.87                     |
| 10           | 134          | Transition sentence.                                                                                  | a comma                                                                                                                                        | 1.16                      | 0.38                     |
| 6            | 86           | Consecutive years, used in football season naming.                                                    | specific dates or months                                                                                                                       | 0.85                      | 0.76                     |
| 4            | 2            | mind. Noun. the element of a person that enables them to be aware of the world and their experiences. | concept of thinking, remembering, and having memories                                                                                          | 0.77                      | 11.19                    |
| 10           | 51           | Apostrophe s, possessive.                                                                             | something specific, such as a ticket, tenure, film, song, movement, project, game, school, title, park, congressman, author, or art exhibition | 0.37                      | -0.01                    |
| 8            | 125          | Describing someone in a paraphrasing style. Name, Career.                                             | publications, reviews, or people associated with the media industry                                                                            | -0.34                     | 0.42                     |
| 4            | 33           | light. Noun. the natural agent that stimulates sight and makes things visible.                        | light                                                                                                                                          | 6.25                      | 3.43                     |
| 10           | 50           | Doing something again, or making something new again.                                                 | introduction of something new                                                                                                                  | 0.84                      | -0.27                    |
| 10           | 86           | Consecutive years, this is convention to name football/rugby game season.                             | a specific date or time of year                                                                                                                | 1.35                      | -0.75                    |
| 4            | 193          | Time span in years.                                                                                   | many of them are related to dates and historic places                                                                                          | 0.07                      | 1.39                     |
| 10           | 195          | Consecutive of noun (Enumerating).                                                                    | different aspects of culture, such as art, music, literature, history, and technology                                                          | -0.83                     | 9.83                     |



Table A6: SASC explanations for modules selected by 25-coefficient linear model on *SST2* for a single seed. Green shows explanations deemed to be relevant to the task.

| Layer, Factor index | Explanation                                                                       | Linear coefficient |
|---------------------|-----------------------------------------------------------------------------------|--------------------|
| (0, 783)            | something being incorrect or wrong                                                | -862.82            |
| (0, 1064)           | negative emotions and actions, such as hatred, violence, and disgust              | -684.27            |
| (1, 783)            | something being incorrect, inaccurate, or wrong                                   | -577.49            |
| (1, 1064)           | hatred and violence                                                               | -499.30            |
| (0, 157)            | air and sequencing                                                                | 463.80             |
| (9, 319)            | a negative statement, usually in the form of not or nor                           | -446.58            |
| (0, 481)            | harm, injury, or damage                                                           | -441.98            |
| (8, 319)            | lack of something or the absence of something                                     | -441.04            |
| (10, 667)           | two or more words                                                                 | 424.48             |
| (2, 783)            | something that is incorrect or inaccurate                                         | -415.56            |
| (0, 658)            | thrice                                                                            | -411.26            |
| (0, 319)            | none or its variations (no, not, never)                                           | -388.14            |
| (0, 1402)           | dates                                                                             | -377.74            |
| (0, 1049)           | standard                                                                          | -365.83            |
| (3, 1064)           | negative emotions or feelings, such as hatred, anger, disgust, and brutality      | -360.47            |
| (4, 1064)           | negative emotions or feelings, such as hatred, anger, and disgust                 | -357.35            |
| (5, 152)            | geography, history, and culture                                                   | -356.10            |
| (0, 928)            | homelessness and poverty                                                          | -355.05            |
| (2, 691)            | animals and plants, as many of the phrases refer to species of animals and plants | -351.62            |
| (0, 810)            | catching or catching something                                                    | 350.98             |
| (0, 1120)           | production                                                                        | -350.01            |
| (0, 227)            | a period of time                                                                  | -345.72            |
| (2, 583)            | government, law, or politics in some way                                          | -335.40            |
| (2, 1064)           | negative emotions such as hatred, disgust, and violence                           | -334.87            |
| (4, 125)            | science or mathematics, such as physics, astronomy, and geometry                  | -328.55            |

Table A7: SASC explanations for modules selected by 25-coefficient linear model on *AG News* for a single seed. Green shows explanations deemed to be relevant to the task.

| Layer, Factor index | Explanation                                                                | Linear coefficient |
|---------------------|----------------------------------------------------------------------------|--------------------|
| (5, 378)            | professional sports teams                                                  | 545.57             |
| (4, 378)            | professional sports teams in the united states                             | 542.25             |
| (3, 378)            | professional sports teams                                                  | 515.37             |
| (0, 378)            | names of sports teams                                                      | 508.73             |
| (6, 378)            | sports teams                                                               | 499.62             |
| (2, 378)            | professional sports teams                                                  | 499.57             |
| (1, 378)            | professional sports teams                                                  | 492.01             |
| (7, 378)            | sports teams                                                               | 468.66             |
| (8, 378)            | sports teams or sports in some way                                         | 468.39             |
| (11, 32)            | activity or process                                                        | 461.46             |
| (12, 1407)          | such                                                                       | 450.70             |
| (5, 730)            | england and english sports teams                                           | 427.33             |
| (12, 104)           | people, places, and events from history                                    | 425.49             |
| (10, 378)           | locations                                                                  | 424.71             |
| (6, 730)            | sports, particularly soccer                                                | 424.24             |
| (12, 730)           | sports                                                                     | 415.21             |
| (4, 396)            | people, places, or things related to japan                                 | -415.13            |
| (10, 659)           | sports                                                                     | 410.89             |
| (4, 188)            | history in some way                                                        | 404.24             |
| (12, 1465)          | different aspects of life, such as activities, people, places, and objects | 403.77             |
| (0, 310)            | end with the word until                                                    | -400.10            |
| (5, 151)            | a particular season, either of a year, a sport, or a television show       | 396.41             |
| (12, 573)           | many of them contain unknown words or names, indicated by <unk             | -393.27            |
| (12, 372)           | specific things, such as places, organizations, or activities              | -392.57            |
| (6, 188)            | geography                                                                  | 388.69             |

Table A8: SASC explanations for modules selected by 25-coefficient linear model on *Emotion* for a single seed. Green shows explanations deemed to be relevant to the task.

| Layer, Factor index | Explanation                                                                       | Linear coefficient |
|---------------------|-----------------------------------------------------------------------------------|--------------------|
| (0, 1418)           | types of road interchanges                                                        | 581.97             |
| (0, 920)            | fame                                                                              | 577.20             |
| (6, 481)            | injury or impairment                                                              | 566.44             |
| (5, 481)            | injury or impairment                                                              | 556.58             |
| (0, 693)            | end in oss or osses                                                               | 556.53             |
| (12, 1137)          | ownership or possession                                                           | -537.45            |
| (0, 663)            | civil                                                                             | 524.88             |
| (6, 1064)           | negative emotions such as hatred, disgust, disdain, rage, and horror              | 523.41             |
| (3, 872)            | location of a campus or facility                                                  | -518.85            |
| (5, 1064)           | negative emotions and feelings, such as hatred, disgust, disdain, and viciousness | 489.25             |
| (0, 144)            | lectures                                                                          | 482.85             |
| (0, 876)            | host                                                                              | 479.18             |
| (0, 69)             | history                                                                           | -467.80            |
| (0, 600)            | many of them contain the word seymour or a variation of it                        | 464.64             |
| (0, 813)            | or phrases related to either measurement (e.g                                     | -455.11            |
| (1, 89)             | caution and being careful                                                         | 451.73             |
| (11, 229)           | russia and russian culture                                                        | -450.28            |
| (0, 783)            | something being incorrect or wrong                                                | 448.55             |
| (12, 195)           | dates                                                                             | 442.14             |
| (12, 1445)          | breaking or being broken                                                          | 439.81             |
| (0, 415)            | ashore                                                                            | -438.22            |
| (0, 118)            | end with a quotation mark                                                         | 437.66             |
| (1, 650)            | mathematical symbols such as >, =, and )                                          | -437.28            |
| (4, 388)            | end with the sound ch                                                             | -437.15            |
| (0, 840)            | withdrawing                                                                       | -436.38            |

## A.4 fMRI MODULE INTERPRETATION

### A.4.1 fMRI DATA AND MODEL FITTING

This section gives more details on the fMRI experiment analyzed in Sec. 5. These MRI data are available publicly (LeBel et al., 2022; Tang et al., 2023), but the methods are summarized here. Functional magnetic resonance imaging (fMRI) data were collected from 3 human subjects as they listened to English language podcast stories over Sensimetrics S14 headphones. Subjects were not asked to make any responses, but simply to listen attentively to the stories. For encoding model training, each subject listened to at approximately 20 hours of unique stories across 20 scanning sessions, yielding a total of  $\sim 33,000$  datapoints for each voxel across the whole brain. For model testing, the subjects listened to two test story 5 times each, and one test story 10 times, at a rate of 1 test story per session. These test responses were averaged across repetitions. Functional signal-to-noise ratios in each voxel were computed using the mean-explainable variance method from (Nishimoto et al., 2017) on the repeated test data. Only voxels within 8 mm of the mid-cortical surface were analyzed, yielding roughly 90,000 voxels per subject.

MRI data were collected on a 3T Siemens Skyra scanner at University of Texas at Austin using a 64-channel Siemens volume coil. Functional scans were collected using a gradient echo EPI sequence with repetition time (TR) = 2.00 s, echo time (TE) = 30.8 ms, flip angle =  $71^\circ$ , multi-band factor (simultaneous multi-slice) = 2, voxel size = 2.6mm x 2.6mm x 2.6mm (slice thickness = 2.6mm), matrix size = 84x84, and field of view = 220 mm. Anatomical data were collected using a T1-weighted multi-echo MP-RAGE sequence with voxel size = 1mm x 1mm x 1mm following the Freesurfer morphometry protocol (Fischl, 2012).

All subjects were healthy and had normal hearing. The experimental protocol was approved by the Institutional Review Board at the University of Texas at Austin. Written informed consent was obtained from all subjects.

All functional data were motion corrected using the FMRIB Linear Image Registration Tool (FLIRT) from FSL 5.0. FLIRT was used to align all data to a template that was made from the average across the first functional run in the first story session for each subject. These automatic alignments were manually checked for accuracy.

Low frequency voxel response drift was identified using a 2nd order Savitzky-Golay filter with a 120 second window and then subtracted from the signal. To avoid onset artifacts and poor detrending performance near each end of the scan, responses were trimmed by removing 20 seconds (10 volumes) at the beginning and end of each scan, which removed the 10-second silent period and the first and last 10 seconds of each story. The mean response for each voxel was subtracted and the remaining response was scaled to have unit variance.

We used the fMRI data to generate a voxelwise brain encoding model for natural language using the intermediate hidden states from the 18th layer of the 30-billion parameter LLaMA model (Touvron et al., 2023a), and the 9th layer of GPT (Radford et al., 2019). In order to temporally align word times with TR times, Lanczos interpolation was applied with a window size of 3. The hemodynamic response function was approximated with a finite impulse response model using 4 delays at -8, -6, -4 and -2 seconds (Huth et al., 2016). For each subject  $x$ , voxel  $v$ , we fit a separate encoding model  $g_{(x,v)}$  to predict the BOLD response  $\hat{B}$  from our embedded stimulus, i.e.  $\hat{B}_{(x,v)} = g_{(x,v)}(H_i(\mathcal{S}))$ .

To evaluate the voxelwise encoding models, we used the learned  $g_{(x,v)}$  to generate and evaluate predictions on a held-out test set. The GPT features achieved a mean correlation of 0.12 and LLaMA features achieved a mean correlation of 0.17. These performances are comparable with state-of-the-art published models on the same dataset that are able to achieved decoding (Tang et al., 2023).

To select voxels with diverse encoding, we applied principal components analysis to the learned weights,  $g_{(x,v)}$ , for GPT across all significantly predicted voxels in cortex. Prior work has shown that the first four principal components of language encoding models weights encode differences in semantic selectivity, differentiating between concepts like *social*, *temporal* and *visual* concepts. Consequently, to apply SASC to voxels with the most diverse selectivity, we found voxels that lie along the convex hull of the first four principal components and randomly sampled 1,500 of them (500 per subject). The mean voxel correlation for the 1,500 voxels we study is 0.35. Note that these

voxels were selected for being well-predicted rather than easy to explain: the correlation between the prediction error and the explanation score for these voxels is 0.01, very close to zero.

#### A.4.2 EVALUATING TOP fMRI VOXEL EVALUATIONS

Table A9 shows two evaluations of the fMRI voxel explanations. First, similar to Fig. 3, we find the mean explanation score remains significantly above zero. Second, we evaluate beyond whether the explanation describes the fitted module and ask whether the explanation describes the underlying fMRI voxel. Specifically, we predict the fMRI voxel response to text using only the voxel’s explanation using a very simple procedure. We first compute the (scalar) negative embedding distance between the explanation text and the input text using Instructor (Su et al., 2022)<sup>5</sup>. We then calculate the spearman rank correlation between this scalar distance and the recorded voxel response (see Table A9). The mean computed correlation is low<sup>6</sup> which is to be expected as the explanation is a concise string and may match extremely few ngrams in the text of the test data (which consists of only 3 narrative stories). Nevertheless, the correlation is significantly above zero (more than 15 times the standard error of the mean), suggesting that these explanations have some grounding in the underlying brain voxels.

Table A9: Evaluation of fMRI voxel explanations. For all metrics, SASC is successful if the value is significantly greater than 0. Errors show standard error of the mean.

| Explanation score        | Test rank correlation |
|--------------------------|-----------------------|
| $1.27\sigma_f \pm 0.029$ | $0.033 \pm 0.002$     |

#### A.4.3 fMRI RESULTS WHEN USING WIKITEXT CORPUS

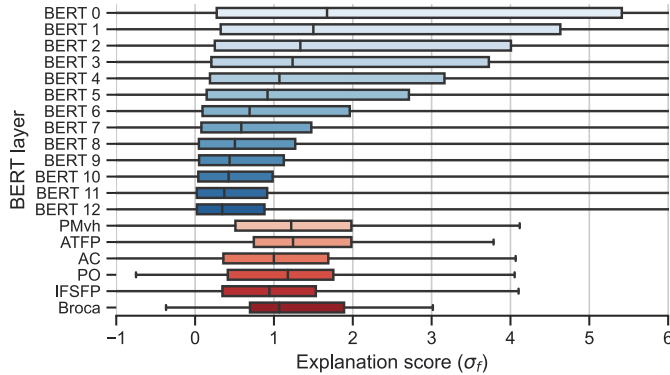

Figure A6: Results in Fig. 3 when using WikiText as the underlying corpus for ngrams rather than narrative stories.

<sup>5</sup>The input text for an fMRI response at time  $t$  (in seconds) is taken to be the words presented between  $t - 8$  and  $t - 2$ .

<sup>6</sup>For reference, test correlations published in fMRI voxel prediction from language are often in the range of 0.01-0.1 (Caucheteux et al., 2022).

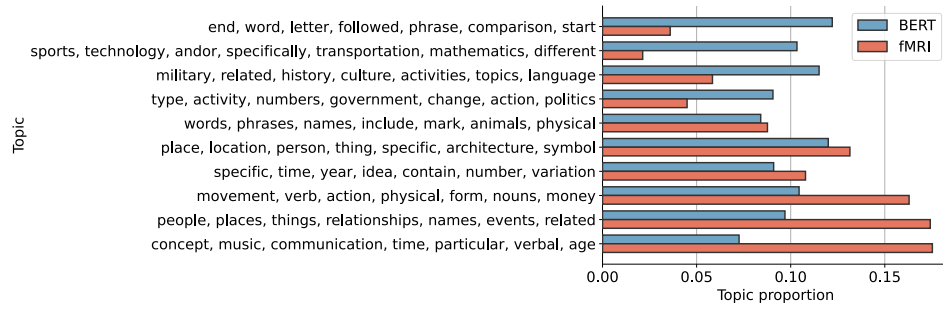

Figure A7: Results in Fig. 4 when using WikiText as the underlying corpus for ngrams rather than narrative stories.
